# Supplementary material
Source: PubMed Central journal article supplement (PMC6195194)

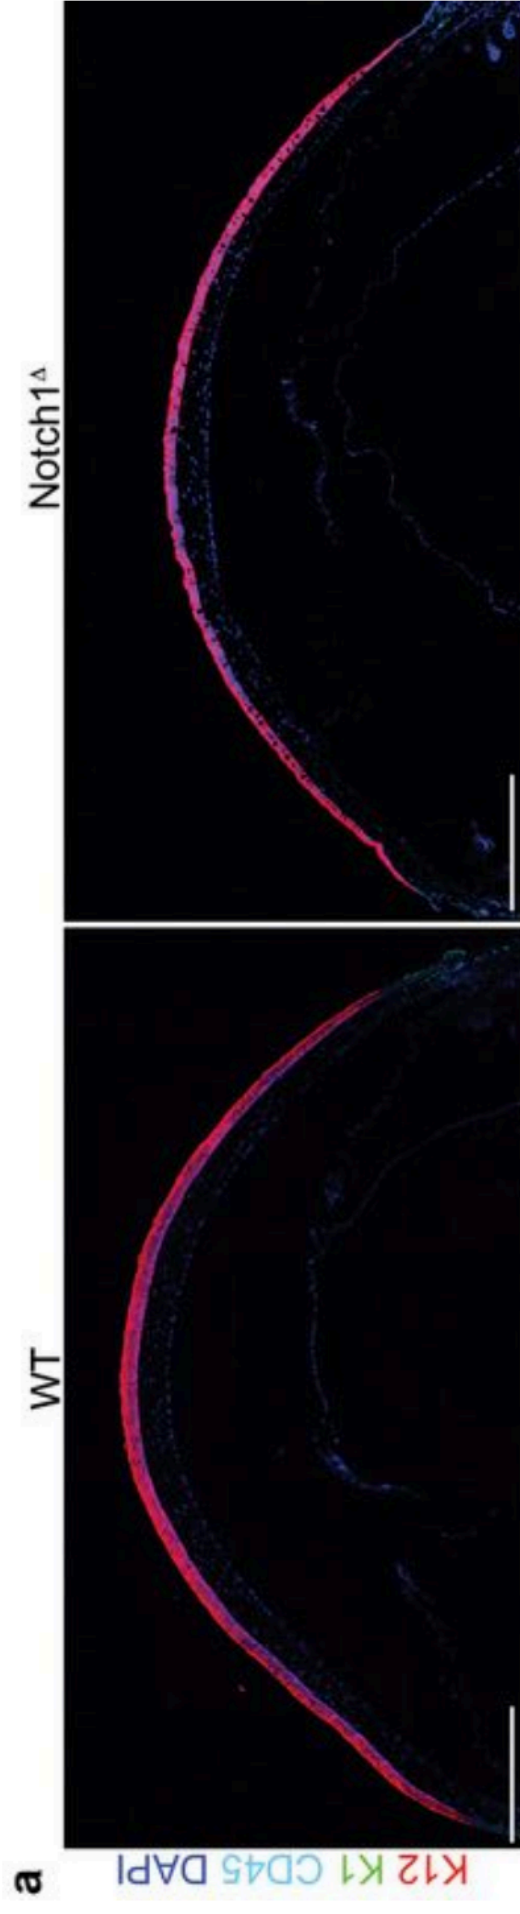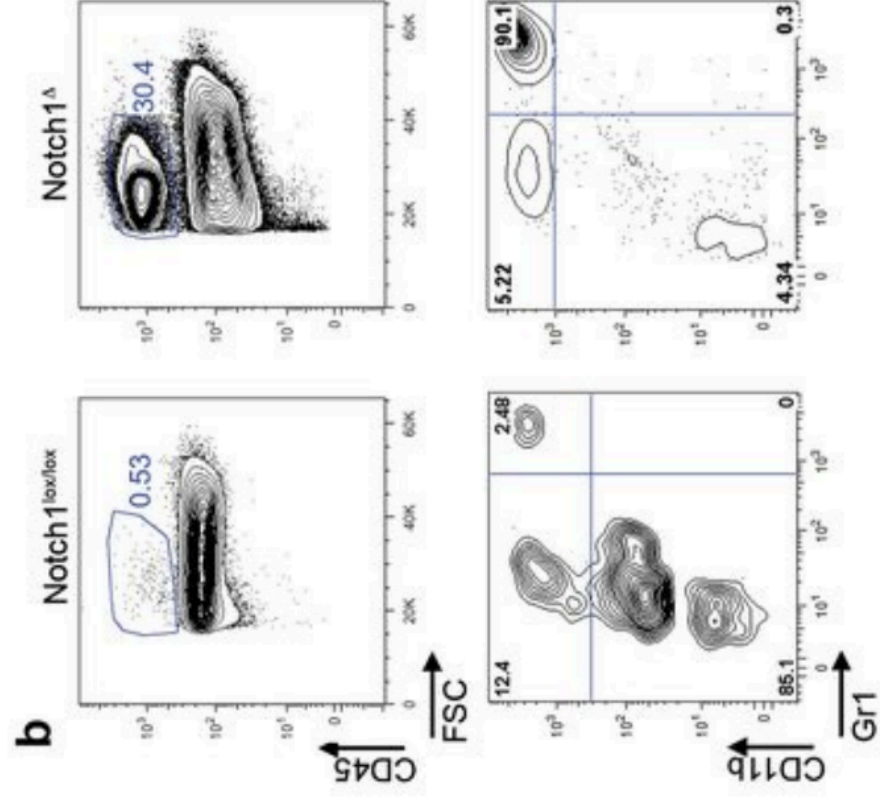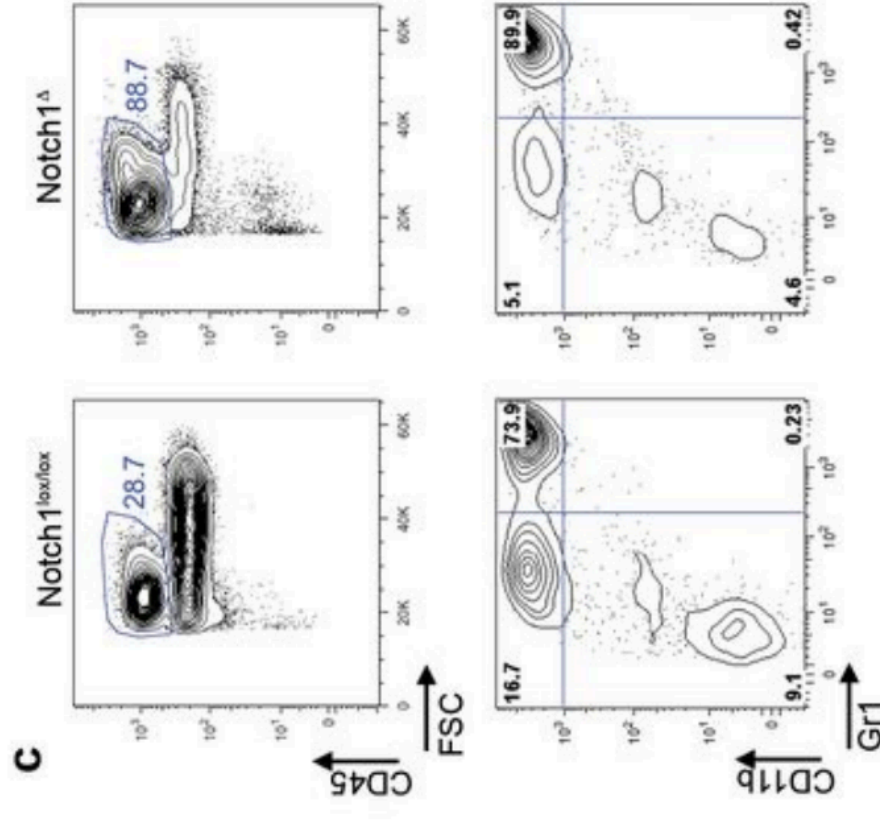

Supplement: NIHMS80066-supplement-Suppl_Fig_1.pdf [file NIHMS80066-supplement-Suppl_Fig_1.pdf]

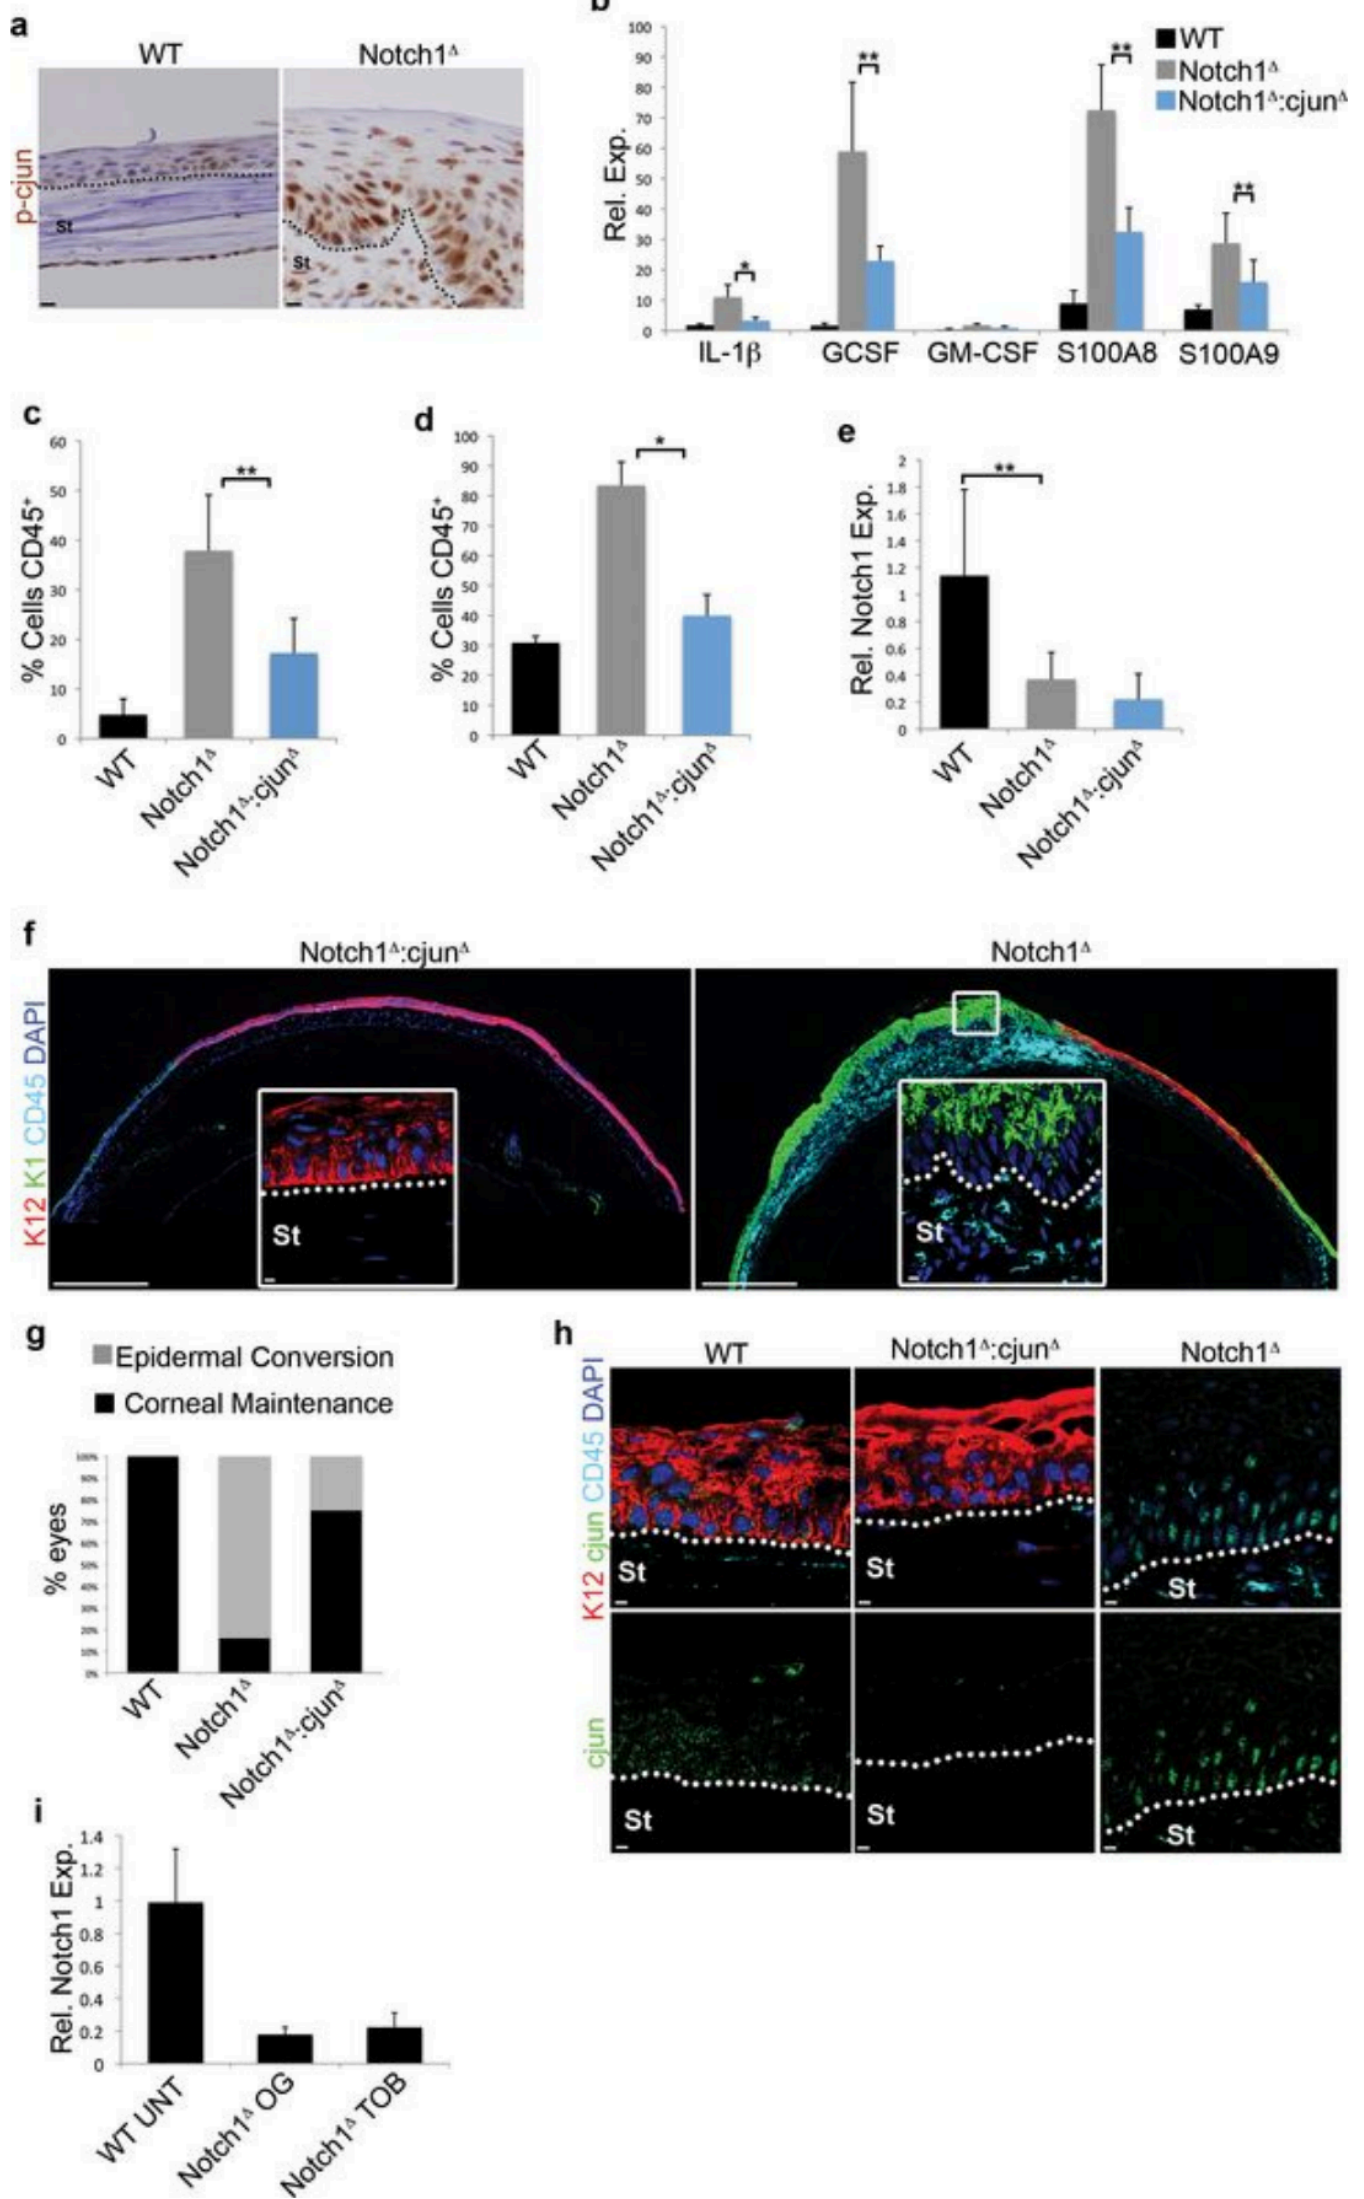

Supplement: NIHMS80066-supplement-Suppl_Fig_2.pdf [file NIHMS80066-supplement-Suppl_Fig_2.pdf]

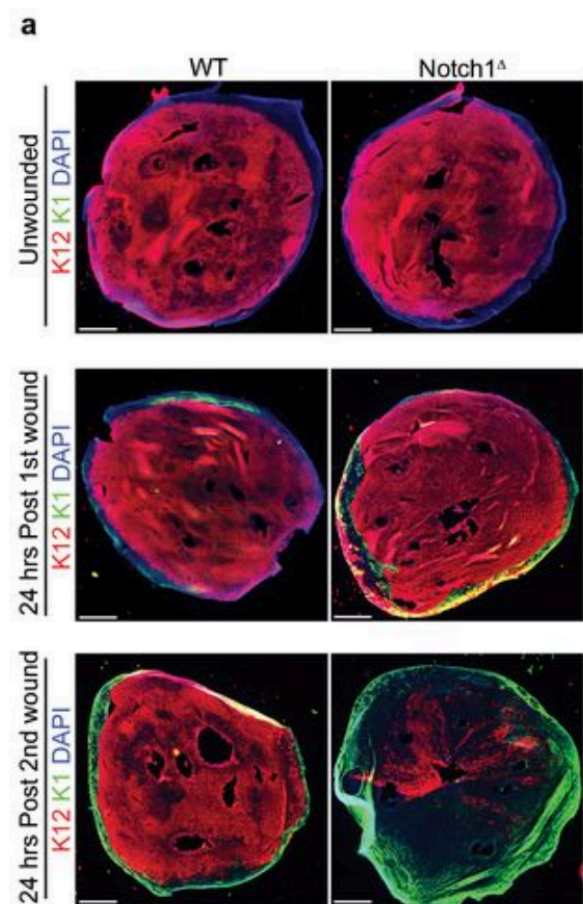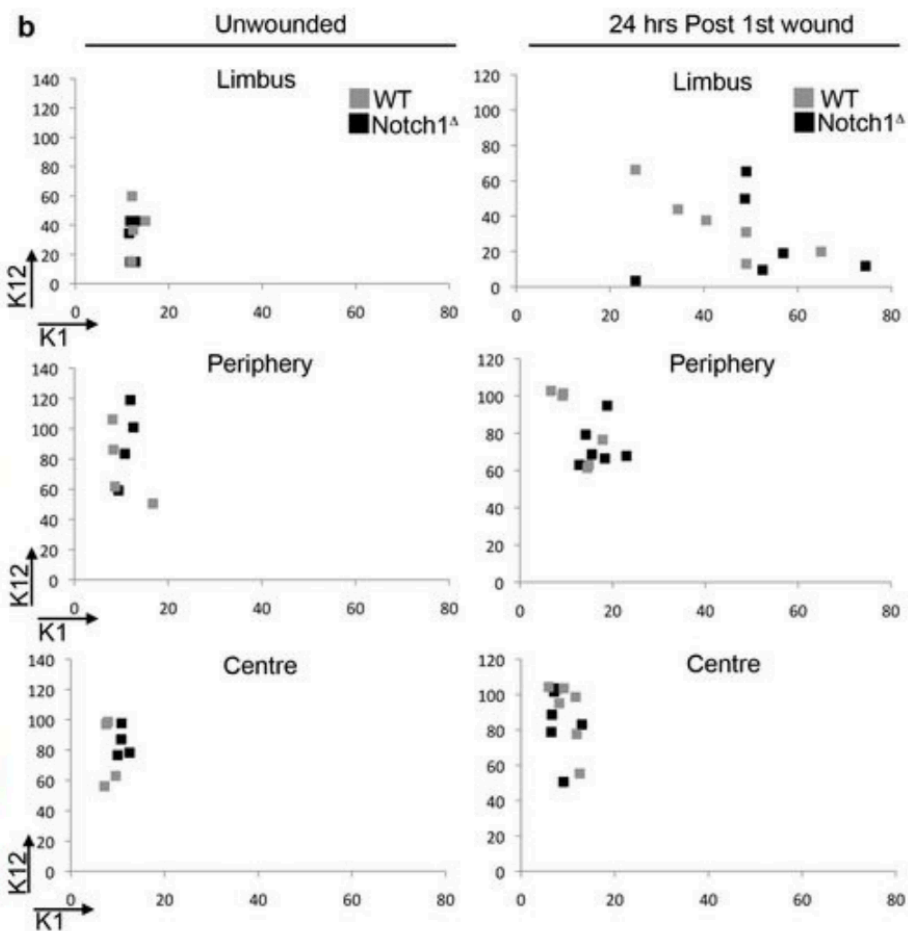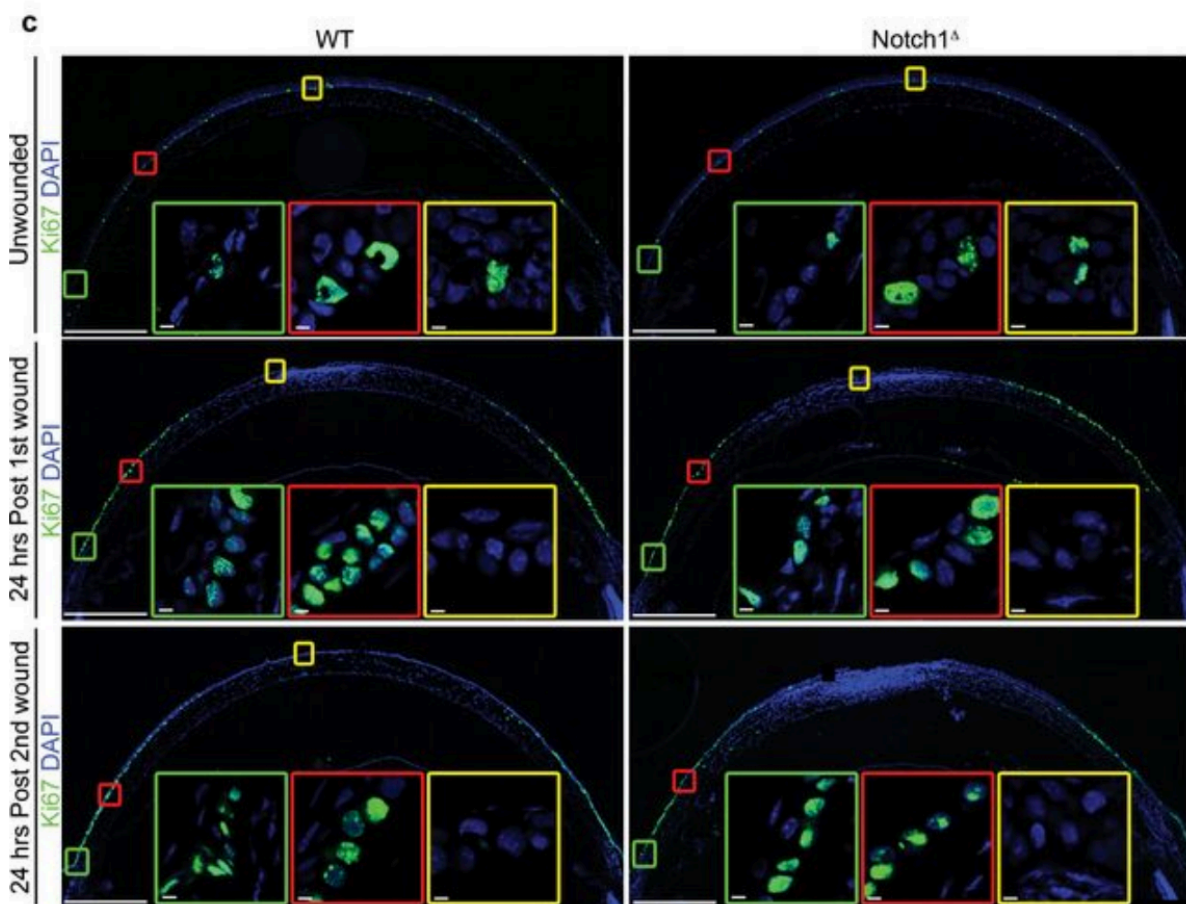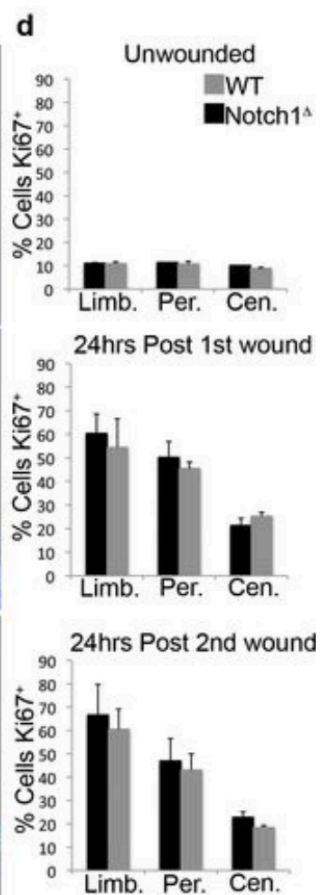

Supplement: NIHMS80066-supplement-Suppl_Fig_3.pdf [file NIHMS80066-supplement-Suppl_Fig_3.pdf]

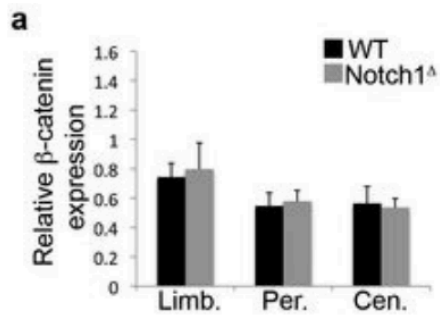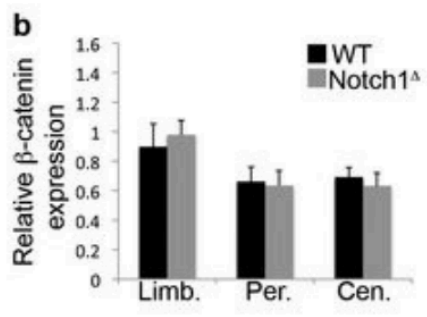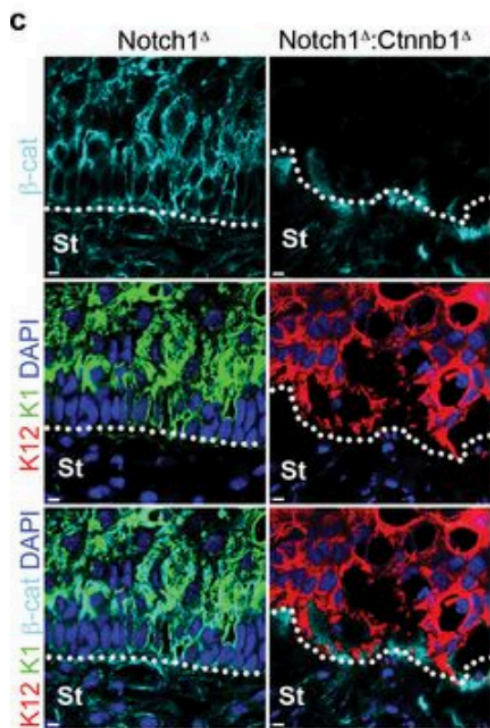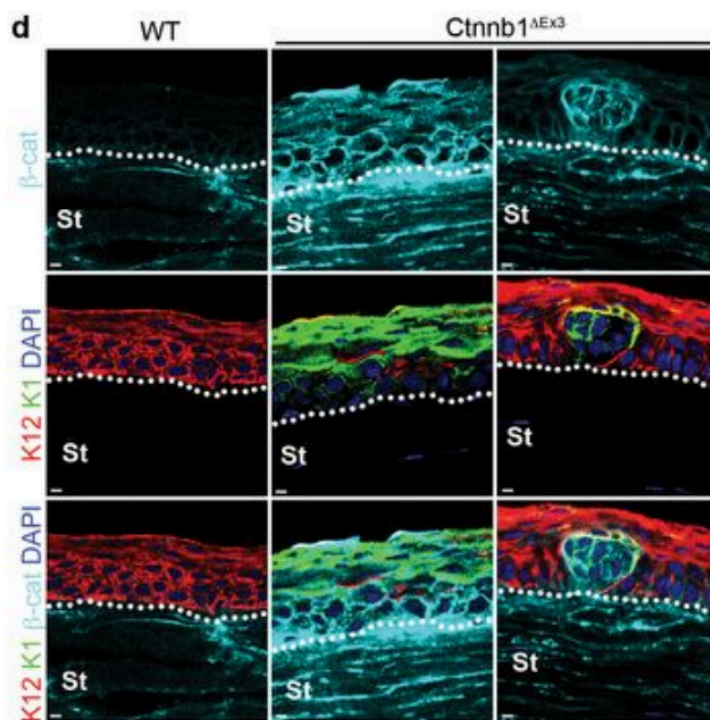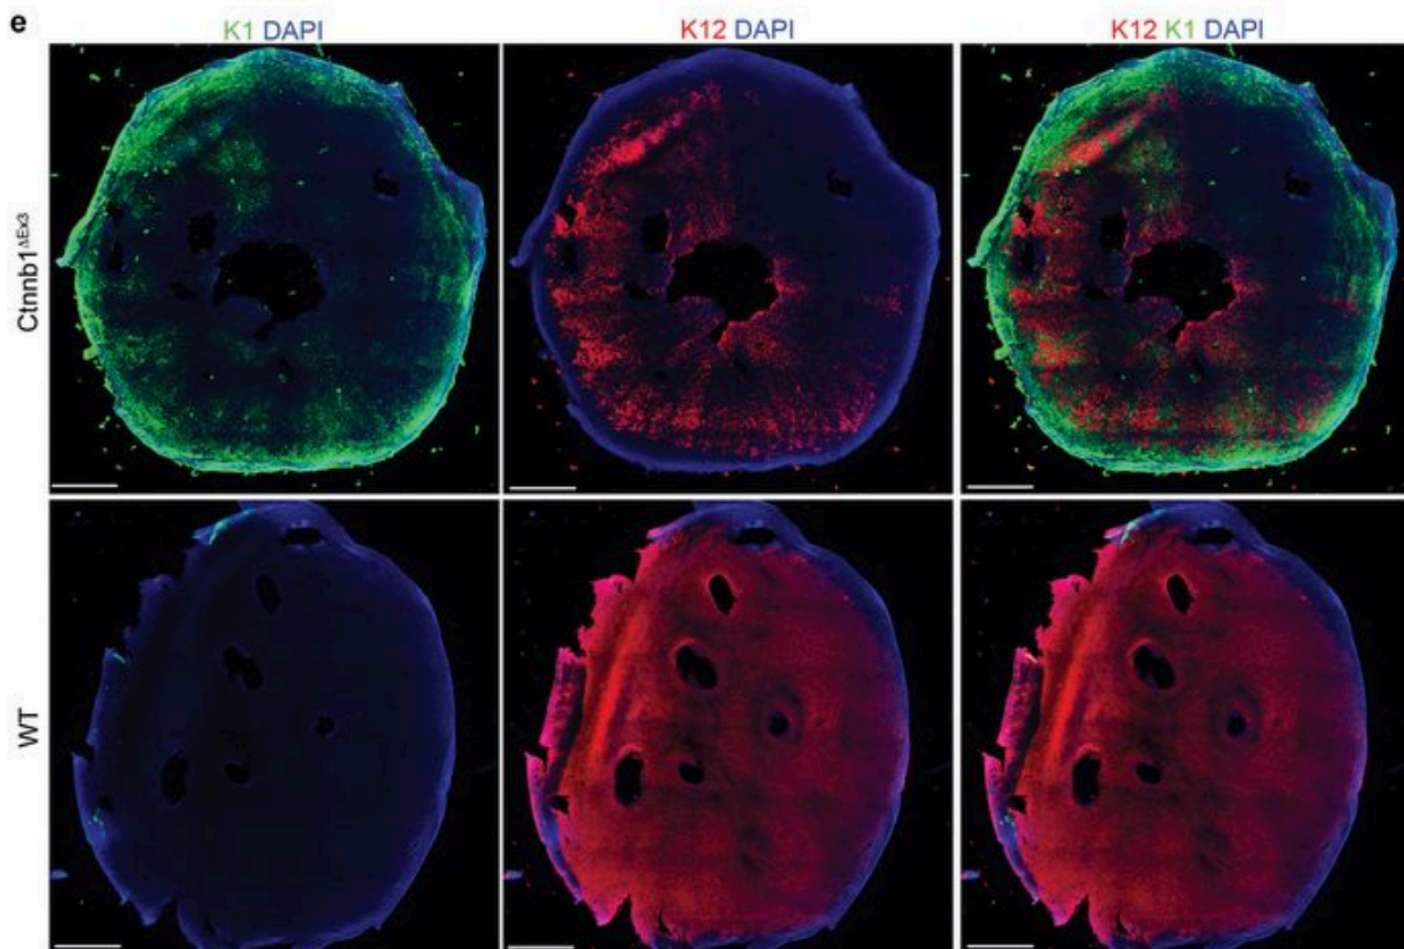

Supplement: NIHMS80066-supplement-Suppl_Fig_4.pdf [file NIHMS80066-supplement-Suppl_Fig_4.pdf]

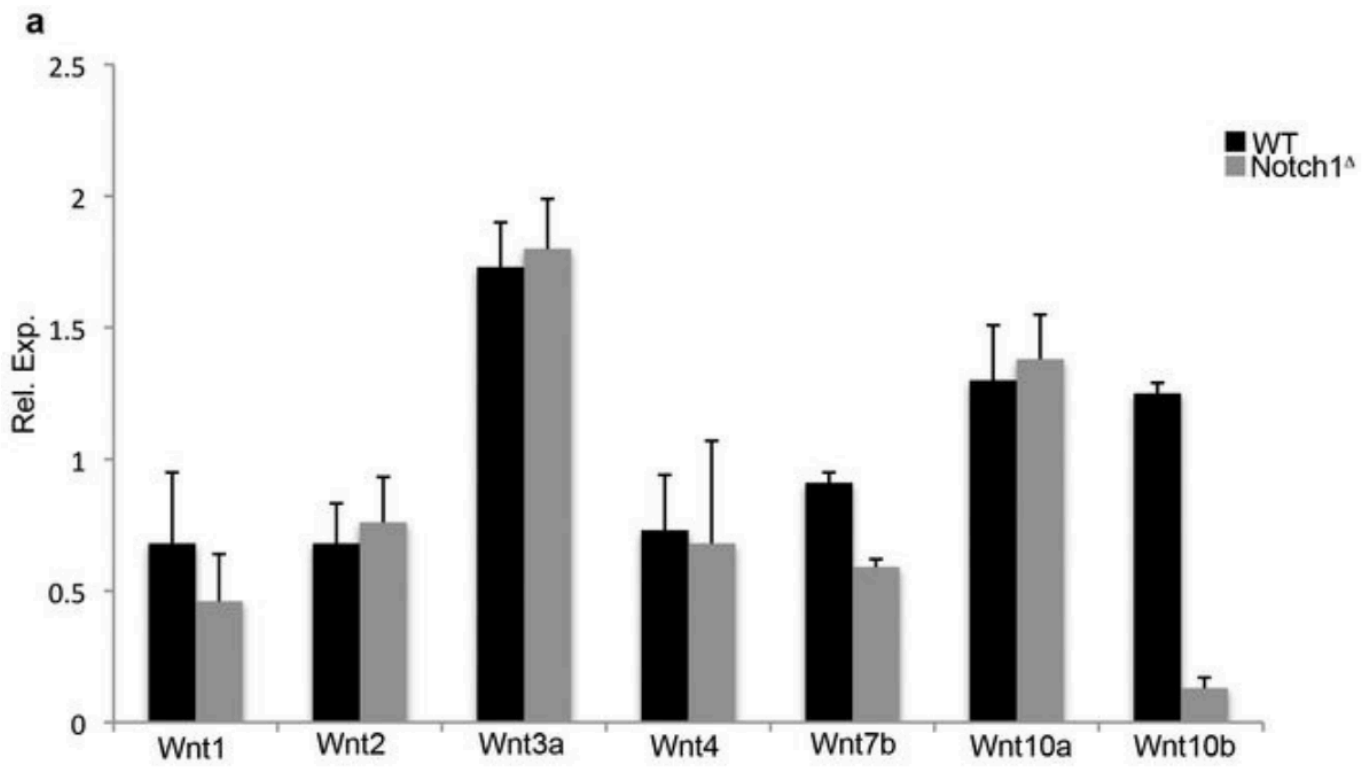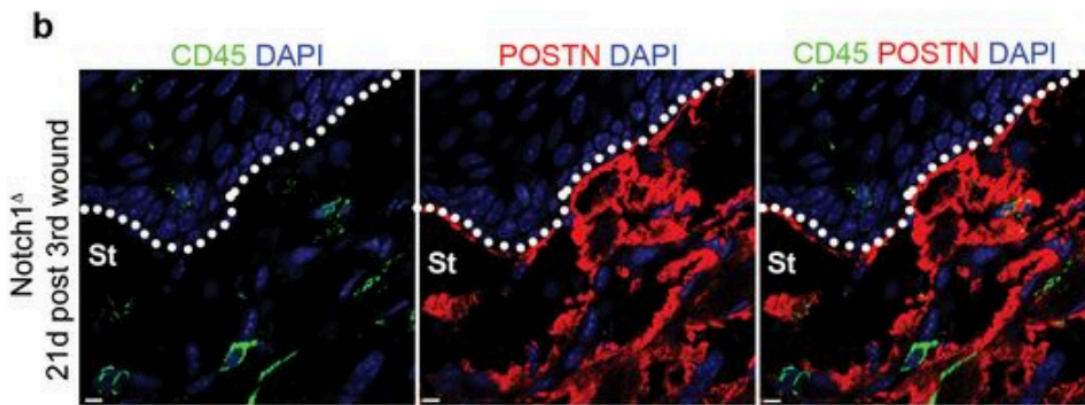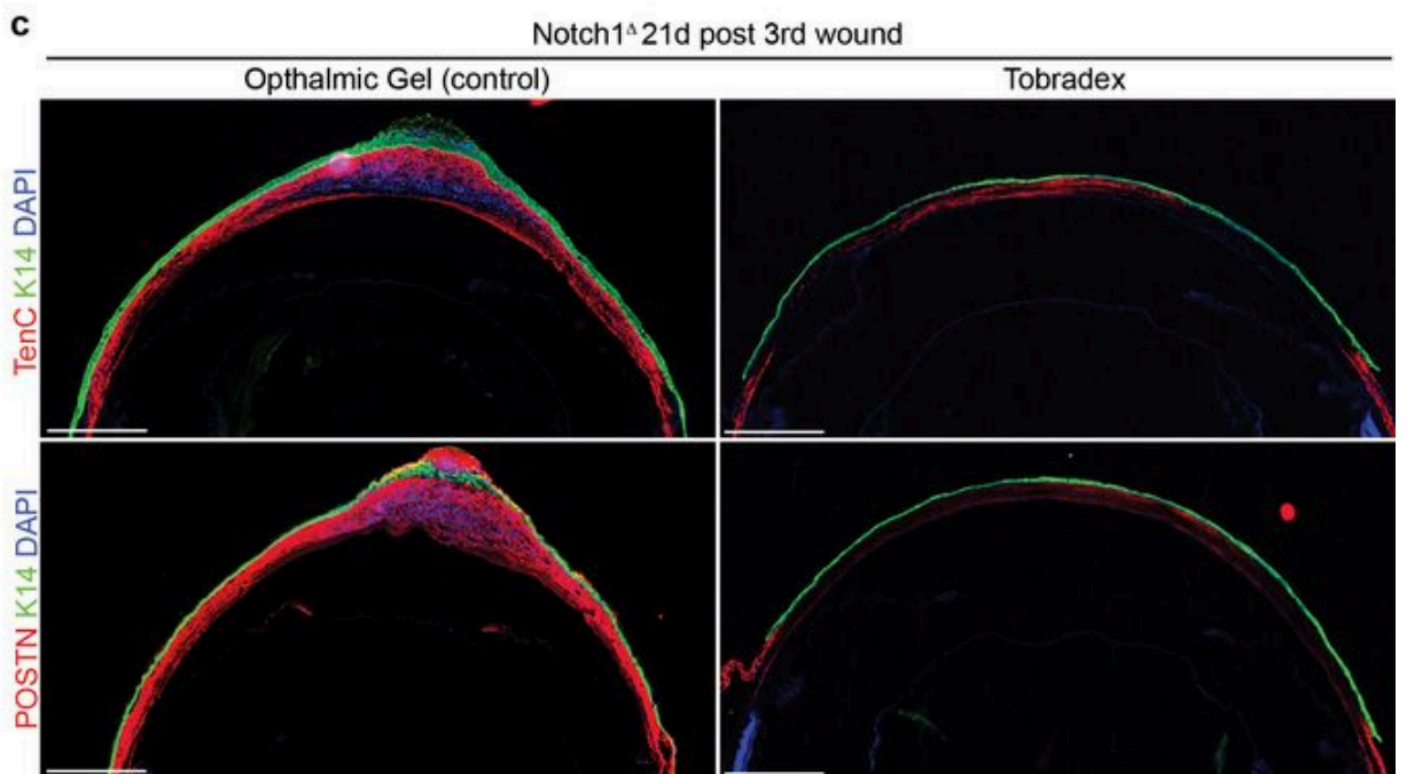

Supplement: NIHMS80066-supplement-Suppl_Fig_5.pdf [file NIHMS80066-supplement-Suppl_Fig_5.pdf]

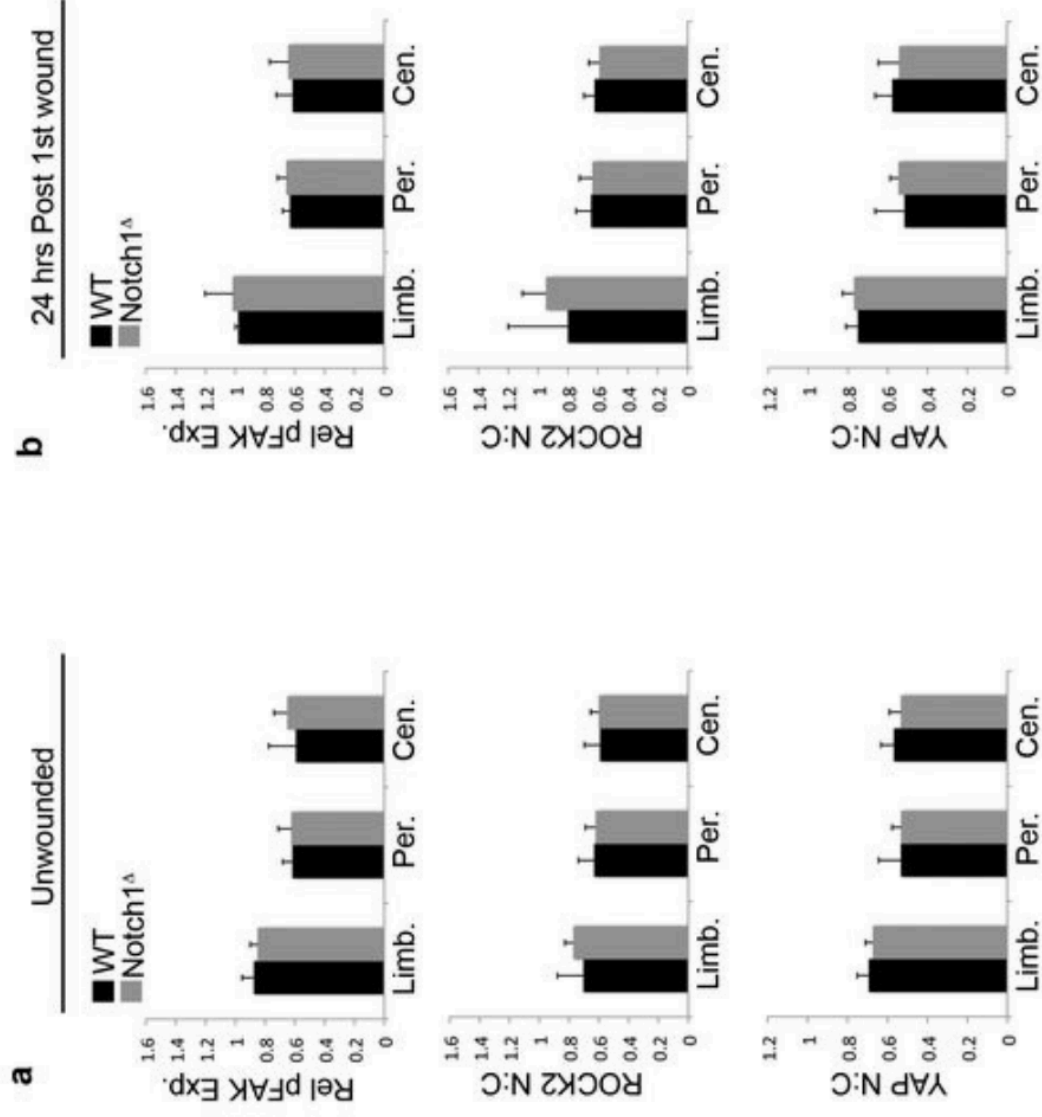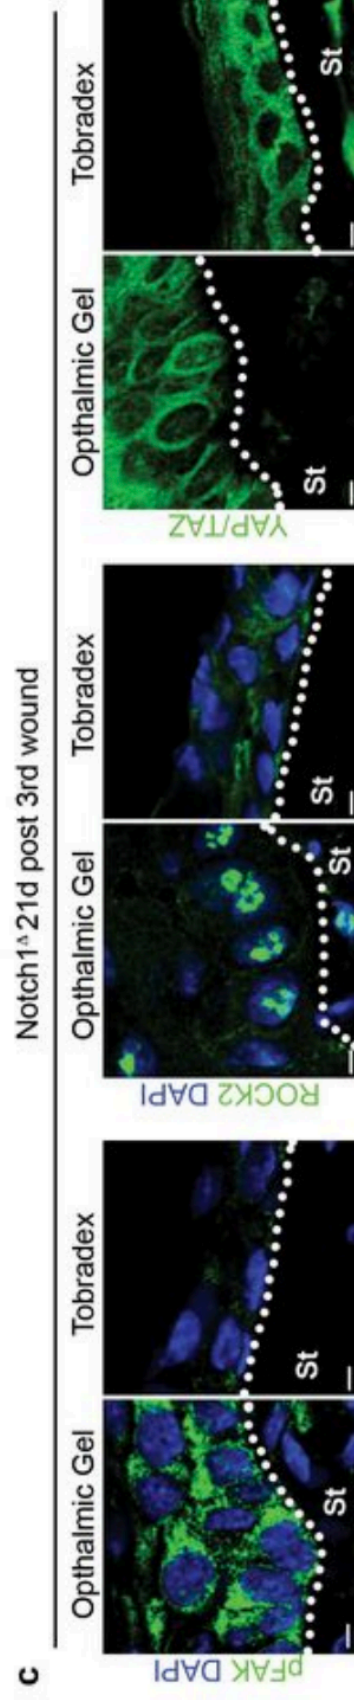

Supplement: NIHMS80066-supplement-Suppl_Fig_6.pdf [file NIHMS80066-supplement-Suppl_Fig_6.pdf]

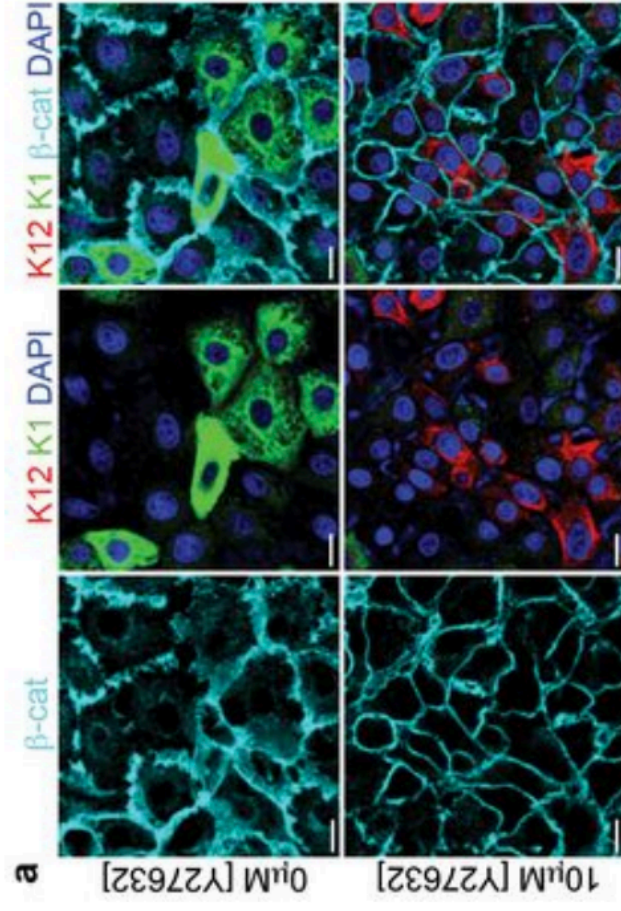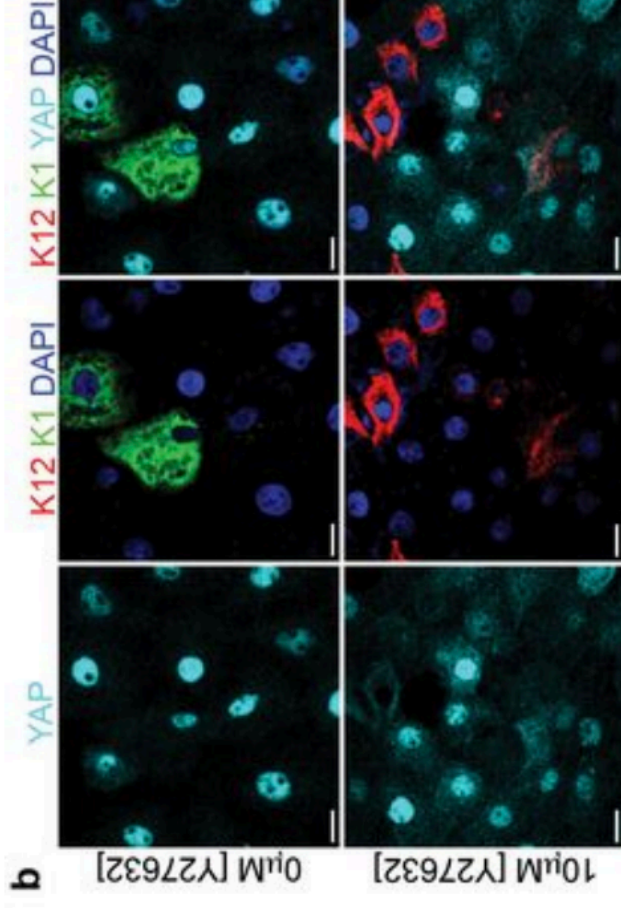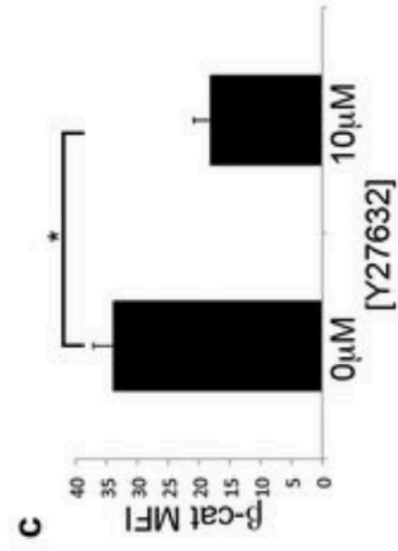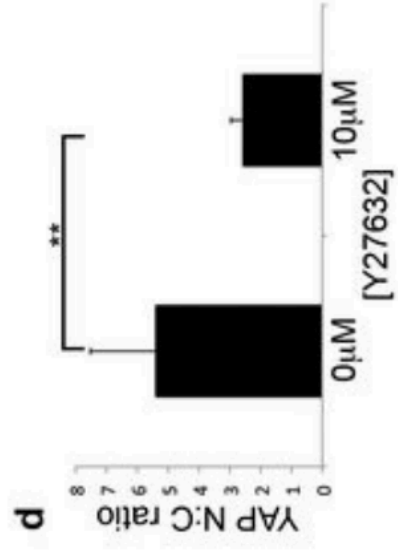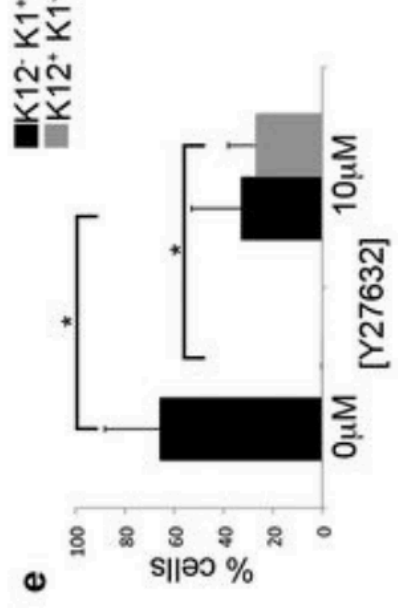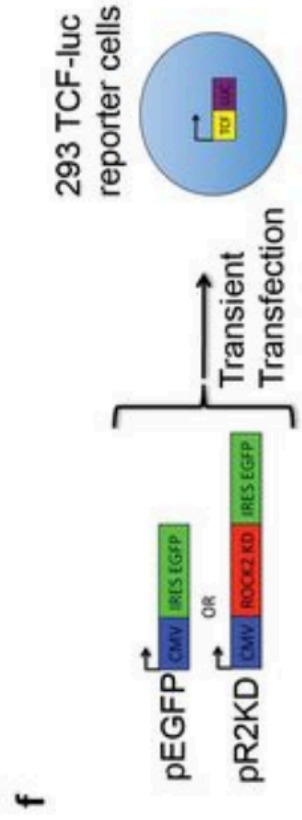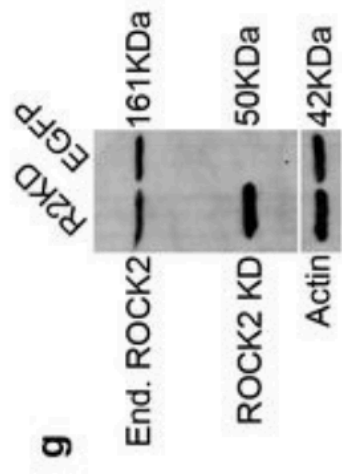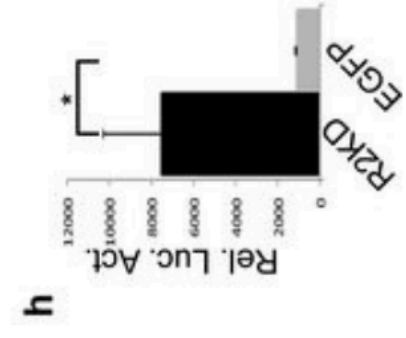

Supplement: NIHMS80066-supplement-Suppl_Fig_7.pdf [file NIHMS80066-supplement-Suppl_Fig_7.pdf]
